# Supplementary material for: The Clinical Features and Prognostic Factors for Treatment Outcomes of Dematiaceous Fungal Keratitis over 9 Years at a Tertiary Eye Care in Northern Thailand
Source: MDPI journal article supplement (doi:10.3390/jof7070526), 2021-06-30
Supplement: s1 [file s1]

## Supplementary result: Sequenced data for species identification

### *Alternaria alternata*

CTGCGGAGGGATCATTACACAAATATGAAGGCGGGCTGGAACCTCTCGGGGTACAGCCTTGCT  
GAATTATTCACCCTTGCTCTTTGCGTACTTCTTGTTTCCTTGGTGGGTTCGCCCACCACTAGGACAA  
ACATAAACCTTTTGTAATTGCAATCAGCGTCAGTAACAAATTAATAATTACAACCTTTCAACAACG  
GATCTCTTGTTCTGGCATCGATGAAGAACGCAGCGAAATGCGATAAGTAGTGTGAATTGCAGA  
ATTGAGTGAATCATCGAATCTTTGAACGCACATTGCGCCCTTTGGTATTCCAAAGGGCATGCCTGT  
TCGAGCGTCATTTGTACCCTCAAGCTTTGCTTGGTGTGGGCGTCTTGTCTCTAGCTTTGCTGGAGA  
CTCGCCTTAAAGTAATTGGCAGCCGGCCTACTGGTTTCGGAGCGCAGCACAAAGTCGCACTCTCTA  
TCAGCAAAGGTCTAGCATCCATTAAGCCTTTTTTTCAACTTTTGACCTCGGATCAGGTAGGGATAC  
CCGCTGAACTTAAGCATATCAATA

### *Bipolaris hawaiiensis*

GATATGCTTAAGTTCAGCGGGTATCCCTACCTGATCCGAGGTCAAACGTGAGAAGGAGTCTTGAT  
GGATTGCCGTCCTCTTTTGCTGATTGCAAGCGCAAAAATGTGCTGCGCTGCGAAACCAGTAGGCC  
GGCTGCCAATCCTTTTAAGGCGAGTCCCCTTTTGGGGGGGACAAAACGCCCAACACCAAGC  
AAAGCTTGAGGGTACAAATGACGCTCGAACAGGCATGCCCTTTGGAATACCAAAGGGCGCAATG  
TGCGTTCAAAGATTCGATGATTCACTGAATTCTGCAATTCACACTACGTATCGCATTTTCGCTGCGT  
TCTTCATCGATGCCAGAACCAAGAGATCCGTTGTTGAAAGTTGTAAATGATTTACATTTGTTATAC  
TGACGCTGATTGCAACTGCATAAAAAAGGTTTATATTGTGGTCCTGGTGGCGAGCGAACCCGCCC  
AGGAAACAACAAGTGCGCAAAAAGACAAGGGTAATAAATAGTCCAGCCGCGAACGGCCTTCGTA  
TTTTATTGTGTAATGATCCCTCCGCAG

### *Colletotrichum gloeosporioides* species complex

ACCTGCGGAGGGATCATTACTGAGTTTACGCTCTATAACCCTTTGTGAACATACCTATAACTGTTG  
CTTCGGCGGGTAGGGTCTCCGCGACCCTCCCGGCCTCCCGCCTCCGGGCGGGTCGGCGCCCCGCCG  
GAGGATAACCAAACCTCTGATTTAACGACGTTTCTTCTGAGTGGTACAAGCAAATAATCAAAACTT  
TTAACAACGGATCTCTTGTTCTGGCATCGATGAAGAACGCAGCGAAATGCGATAAGTAATGTG  
AATTGCAGAATTCAGTGAATCATCGAATCTTTGAACGCACATTGCGCCCCGCCAGCATTCTGGCGG  
GCATGCCTGTTGAGCGTCATTTCAACCCTCAAGCTCTGCTTGGTGTGGGGCCCTACAGCTGATG  
TAGGCCCTCAAAGGTAGTGGCGGACCCTCCCGGAGCCTCCTTTGCGTAGTAACTTTACGTCTCGC  
ACTGGGATCCGGAGGGACTCTTGCCGTAAAACCCCCCAATTTTCAAAGGTTGACCTCGGATCAG  
GTAGGAATACCCGCTGAACTTAAGCATATCA

### *Curvularia lunata*

TCCTCCGCCTTATTGATATGCTTAAGTTCAGCGGGTATCCCTACCTGATCCGAGGTCAAACGTGAG  
AAGGAGTCTTGATGGATTGCCGTCCTCTTTTGCTGATTGCAAGCGCAAAAATGTGCTGCGCTGCG  
AAACCAGTAGGCCGGCTGCCAATCCTTTTAAGGCGAGTCTTTGGCAACCAAAGACAAAAAACGC  
CCAACACCAAGCAAAGCTTGAGGGTACAAATGACGCTCGAACAGGCATGCCCTTTGGAATACCA  
AAGGGCGCAATGTGCGTTCAAAGATTCGATGATTCACTGAATTCTGCAATTCACACTACGTATCG  
CATTTGCTGCGTTCTTCATCGATGCCAGAACCAAGAGATCCGTTGTTGAAAGTTGTAAATGATT  
ACATTTGTTATACTGACGCTGATTGCAACTGCATAAAAAAGGTTTATGATGTGGTCCTGGTGGCG  
GGCGAACCCGCCAGGAAACAACAAGTGCGCAAAAGACAAGGGTAATAATAATTACGCCTCC  
GCAAACTGGCCCGAGAGCACAGCCGCGTACAGCCTTCATATTTTATTGTGTAATGATCCCTCCG  
CAGTTTACCCTACGGA

*Exophiala jeanselmei*

TGCGGAGGGATCATTACCGAGTTAGGGTCCTCACAGGGCCCGACCTCCCAACCCTTTGTTTACGA  
TACCTAGTGTTGCTTCGGTAGGCCTGGTCTCTGACCTGCCGGGGGGCCGTGAAACGCCCGCCGGA  
GAGCGCTGCCGACAGCCCCAACCTTTAAAATTCTTAACCAAACGTGACTTGTCTGAGTAAACGT  
CTTTTAAATAAAAGCAAAACTTTCAACAACGGATCTCTTGTTCTGGCATCGATGAAGAACGCAG  
CGAAATGCGATAAGTAATGCGAATTGCAGAATTCTCGTGAGTCATCGAATCTTTGAACGCACATT  
GCGCCCTTTGGTATTCCGAAGGGCATGCCTGTTTCGAGCGTCATTTTACCCCTCAAGCCCCGGCTT  
GGTGTTGGACGGTTTGGTCTCGGGTCCGACCCCCCTTGACCCCTCCCAAAGACAATGACGGCGGG  
CTGTTTCGACCCCCGGTACACTGAGCATCTTAACGGAGCACGTACCGGTCTTTTGAGGGTCGACGG  
CACCCGGTCTATACCTATATCTTTTTTTACAAGGTTGACCTCGGATCAGGTAGGAATACCCGCTGA  
ACTTAAGCATATCA

*Exserohilum rostratum*

ACCTGCGGAGGGATCATTACTGAGTTTACGCTCTATAACCCTTTGTGAACATACCTATAACTGTTG  
CTTCGGCGGGTAGGGTCTCCGCGACCCTCCCGGCCTCCCGCCTCCGGGCGGGTCGGCGCCCGCCG  
GAGGATAACCAAACCTCTGATTTAACGACGTTTCTTCTGAGTGGTACAAGCAAATAATCAAAACTT  
TTAACAACGGATCTCTTGTTCTGGCATCGATGAAGAACGCAGCGAAATGCGATAAGTAATGTG  
AATTGCAGAATTCAGTGAATCATCGAATCTTTGAACGCACATTGCGCCCGCCAGCATTCTGGCGG  
GCATGCCTGTTTCGAGCGTCATTTCAACCCTCAAGCTCTGCTTGGTGTGGGGCCCTACAGCTGATG  
TAGGCCCTCAAAGGTAGTGGCGGACCCTCCCGGAGCCTCCTTTGCGTAGTAACTTTACGTCTCGC  
ACTGGGATCCGGAGGGACTCTTGCCGTAAAACCCCCCAATTTCCAAAGGTTGACCTCGGATCAG  
GTAGGAATACCCGCTGAACTTAAGCATATCA

*Fonsecaea pedrosoi*

TTTCCTCCCGGCTTATGATATGCTTAAGTTCAGCGCGTATTCCTACCTGATCCGAGGTCAACCTTA  
GAAAAAAGTGTTCCCGTGAGGGAGAAGACCGGGTCCCGGGCGCCCTTCATCCGATACGTGCTC  
AGTTAAGAAGCTCAGTGTACCGGGGGTCCGCGAGGCCCGCGTCATTGTCTTTAGGAGGGGTGGA  
AAGTGTGAACTTACTCCACCAAGCCGTCCAACACCAAGCACAGGGGCTTGAGGGGGTGATAATG

ACGCTCGAACAGGCATGCCCTTCGGAATACCAAAGGGCGCAATGTGCGTTCAAAGATTTCGATGA  
CTCACTGGAATTCTGCAATTCGCATTACTTATCGCATTTTCGCTGCGTTCTTCATCGATGCCAGAAC  
CAAGAGATCCGTTGTTGAAAGTTTTTGCTTTTAATTGAATAAAATCACTTAGACATTGTAAATCAT  
GATTGATCCAGAGTTAGGAGATTAGGCTATCGGCAGACACTGGCCAGAGGCAACGCCCGCATTG  
AGCGGTCCTCCAGCGGTCAGCTTAAGACGGGCCTGCCGAAGCAACTGAGGTCAAGTAAACAAA  
GGGTTGGGAGGTCGGGCCTAGAAGACCCTAACTCATTAATGATCCTTCCGCAGGTTA

*Lasiodiplodia theobromae*

CTTCCGTAGGTGAACCTGCGGAAGGATCATTACCGAGTTTTTCGAGCTCCGGCTCGACTCTCCCAC  
CCTTTGTGAACGTACCTCTGTTGCTTTGGCGGCTCCGGCCGCCAAAGGACCTTCAAACCTCCAGTCA  
GTAAACGCAGACGTCTGATAAACAAGTTAATAAACTAAAACTTTCAACAACGGATCTCTTGTTTC  
TGGCATCGATGAAGAACGCAGCGAAATGCGATAAGTAATGTGAATTGCAGAATTCAGTGAATCA  
TCGAATCTTTGAACGCACATTGCGCCCCCTTGGTATTCCGGGGGGCATGCCTGTTTCGAGCGTCATTA  
CAACCCTCAAGCTCTGCTTGGAATTGGGCACCGTCCTCACTGCGGACGCGCCTCAAAGACCTCGG  
CGGTGGCTGTTTCAGCCCTCAAGCGTAGTAGAATACACCTCGCTTTGGAGCGGTTGGCGTCGCCCG  
CCGGACGAACCTTCTGAACTTTTCTCAAGGTTGACCTCGGATCAGGTAGGGATACCCGCTGAACT  
TAAGCATATCAATAAGCGGAGGAA

*Papulaspora equi*

CTGCGGAGGGATCATTACAGAGTTGCAAAACTCCCCAAACCATCGTGAACCTTTACCGCTAAAC  
AGTTGCTTCGGCGGGTGGCCCCGCGGGGGCCGCCGAGCCCGCCGAGGAATCCAAAAAACCATC  
GCTTTCAGTACCGGCCTCTCTGAGTTACTGTACTTTTAATTAAGTCAAAACTTTCAACAACGGATC  
TCTTGTTCTGGCATCGATGAAGAACGCAGCGAAATGCGATAAGTAATGTGAATTGCAGAATTC  
AGTGAATCATCGAATCTTTGAACGCACATTGCGCCCCGCCAGTATTCTGGCGGGCATGCCTGTTTCG  
AGCGTCATTTCCACCATCAGGCCCCCGGGCCTGTGTTGGGGACCTGCGGCTGCCCGCAGGCCCCG  
AAATTCAGTGGCGGTGCGGCCGTAGCAACCGAGCGTAGTAACTAAAACGTCTCGCTCTGGCTCG  
CTGGGCGCGCTCCGGCCGTAAAACACCCCCCTTTTCGCAAAGGTTGACCTCGGATCAGGTAGG  
AATACCCGCTGAACTTAAGCATATCAATAA

*Phaeoacremonium parasiticum*

TCCTCCGCTTATTGATATGCTTAAGTTCAGCGGGTATTCTACCTGATCCGAGGTCAACCTTTGGA  
AGTTGGGGTGTTTTACGGCTGGTAAAACCCACCAGGCGCTCCACAGCGAGAGAGAATTACTGCG  
CTCGGAGTCCTGGCGAGCCCCGCCACTGACTTTTCGGGGCCCGCGCCCGCTGAGGGTGCGCGGCGC  
CCCAACACCAGGCAACCAGGGCCTGAGGGTTGAAATGACGCTCGGACAGGCATGCCCGCCAGA  
ATACTGGCGGGCGCAATGTGCGTTCAAAGATTTCGATGATTCACTGAATTCTGCAATTCACATTAC  
TTATCGCATTTTCGCTGCGTTCTTCATCGATGCCAGAACCAAGAGATCCGTTGTTGAAAGTTTTTAC  
TTGTTTGTAATAATACTCAGAGAGGTACGTTTTGTAATACAGAGTCTGTGCCCTCCGGCAGGC  
CCACCCGGCCGGCCCCGCGAGGAGGCGGCCCGCGGCGGCTTCAGGCCCGGAGGCCGTCCGCCT  
TCACCTGCCGAAGCAACGAAAACAGGTATGTTACAAAGGGTTTGGAGTACGAAACTCGTTAAT  
GATCCCTCCGCAGGTTACCCCTACGGA

*Phialophora verrucosa*

TGCGGAAGGATCATTAAACGAGTTAGGGTCTCTCCAGGCCCGACCTCCCAACCCTTTGTCTACCTT  
GCTGCATGTTGCTTTGGCGGACCCGTCTCACGACCGCCCTGGGACCGCCGAGAGGCGTCCCTAGG  
CCCGTGTCCGCCGATAGCCAACCTAAACTCTTGGATGAATCGTGTTTTATGTCTGAGTCTTGTGAT  
TAAATCAAAAGCAAAAACCTTCAACAACGGATCTCTTGGTTCTGGCATCGATGAAGAACGCAGC  
GAAATGCGATAAGTAATGCGAATTGCAGAATTCCCGTGAGTCATCGAATCTTTGAACGCACATTG  
CGCCCTTTGGTATTCCAAAGGGCATGCCTGTTGAGCGTCATTATCACCCCTCAAGCCCCGTGCTT  
GGTGTTGGACGGATCTTGGTCGTGTGATCGCGACCCCTCCTAAAGACAATGACGGCGGCCTGTGG  
ATCCCCCGGTACACTGAGCTTTTAACTGAGCACGTATCGGACAAGGGCGCCCAGGACCCGGTCC  
TTCTCCTTTAACCAGGAAATTTCTTCAAGGTTGACCTCGGATCAGGTAGGAATACGCGCTGAACCT  
AAGCATATCAAT

*Torula chromolaenae*

GAGGAAAAGAAACCAACAGGGATTGCCCCAGTAACGGCGAGTGAAGCGGCAACAGCTCAAATT  
TGAAATCTGGCTCCTTTGGGGTCCGAGTTGTAATTTGCAGAGGGAGCTTTTGGCGTCGGTCGTGGT  
CTAAGTTCCTTGGAACAGGACGTCACAGAGGGTGAGAATCCCGTACGTGGCCGCCGGCCTTCGC  
CTTGTAAGCCCTTCGACGAGTCGAGTTGTTTGGGAATGCAGCTCTAAATGGGAGGTAAATTTCT  
TTCTAAAGCTAAATACCCGCCAGAGACCGATAGCGCACAAGTAGAGTGATCGAAAGATGAAAA  
GCACTTTGGAAAGAGAGTGAAAAAGCACGTGAAATTGTTGAAAGGGAAGCGCTTGCAGCCAGA  
CGTGCCCCGCGTTGATCATCCAGGCTCCAGCCTGGTGCACCTCCTCCGCGGGCAGGCCAGCATCAG  
TTCGGGCGGTTCGGATAAAGGCCTCTATCACGTACCACCCCTCGGGGTGGCCTTATAGGGGAGGC  
GCAACACGGCCAGCCCGGACTGAGGTTCCGCGCATCTGCTAGGATGCTGGCGTAATGGCGGCAA  
GCGGCCCCGTC

*Pleosporales spp.*

ACCTGCGGAAGGATCATTACTGTTGAAACGTCTCGGCCAGTCGTGTCCCGCATTGGGGCCTTCTG  
CGCCAGCGTTTAGCACCCCTTGATTTTGAGCACCTTTTGTTTCCTCGGCGGGTTCGCCCGCCAGCGA  
GGACCCCCATGAACTCTTTGCAATAGCAATTTTTGTCTGAAATACAAACAATAATCAAAACTTTC  
AACAATGGATCTCTTGGTTCTGGCATCGATGAAGAACGCAGCGAAATGCGATAAGTAGTGTGAA  
TTGCAGAATTCAGTGAATCATCGAATCTTTGAACGCACATTGCGCCCCCTCGGTATTCCGTGGGGC  
ATGCCTGTTGAGCGTCATTTAAACCCTCAAGCTCAGCTTGGTGTTGGGTGCTTGTCCCGCCTCCG  
CGCGGCGACTCACCTCAAAGTCAGTGGCAGCCCGCATCAGCCGGCCGTGAGCGCAGCACAGTCG  
CGCCCTAGGCCCCGGCAGGTTCGGTCTCTCCAGAAGCACATCTTCTATTTTGACCTCGGATCAGGT  
AGGGATACCCGCTGAACTTAAGCATATCAATA
